# Supplementary material for: Performance Evaluation of Large Language Models in Real-World Perinatal Medication Consultations: A Cross-Sectional Study
Source: Research Square preprint supplement (doi:10.21203/rs.3.rs-8696873/v1), 2026-02-04
Supplement: Supplementary file 1 [file 6b66466072c56c718bded7d5.docx]

**Supplementary Table S1. Composition of the perinatal medication consultation question set**

| **Domain** | **No. of questions (%)** | **Representative example questions*** |
| --- | --- | --- |
| Safety evaluation during pregnancy/lactation | 25 (39.1%) | “Is drug X safe to use during the second trimester?” |
| Drug administration and dosage guidance | 12 (18.8%) | “What should be done if a dose of drug Y is missed during pregnancy?” |
| Management of adverse drug reactions | 8 (12.5%) | “How should nausea occur after drug Z be managed in early pregnancy?” |
| Drug interactions | 7 (10.9%) | “Can drug A be co-administered with drug B during lactation?” |
| Complex therapeutic decision-making | 12 (18.8%) | “How should asthma be managed in a pregnant patient with multiple comorbidities?” |

*Examples paraphrased and anonymized.
